# Supplementary material for: Lack of Association of the Ala45Thr Polymorphism and Other Common Variants of the NeuroD Gene With Type 1 Diabetes
Source: Oxford University Press journal article supplement (doi:10.2337/diabetes.53.4.1158), 2004-04-01
Supplement: 1158-sup-db031133_appendix.doc [file 1158-sup-db031133_appendix.doc]

**Supplementary Information**

Appendix 1.1: D values for common polymorphisms identified by resequencing of *NEUROD1* in 32 affected individuals

| **DIL Reference Number** | **4565** | **2402** | **4566** | **4567** | **4568** |
| --- | --- | --- | --- | --- | --- |
| **4565** | 0.333 |  |  |  |  |
| **2402** | 0.906 | 0.659 |  |  |  |
| **4566** | 1.000 | 1.000 | 0.079 |  |  |
| **4567** | 0.848 | 0.692 | 1.000 | 0.923 |  |
| **4568** | 1.000 | 0.993 | 1.000 | 0.571 | 0.654 |

Appendix 1.2: r2 values for common polymorphisms identified by resequencing of *NEUROD1* in 32 affected individuals

| **DIL Reference Number** | **4565** | **2402** | **4566** | **4567** | **4568** |
| --- | --- | --- | --- | --- | --- |
| **4565** | 0.333 |  |  |  |  |
| **2402** | 0.722 | 0.659 |  |  |  |
| **4566** | 0.026 | 0.018 | 0.079 |  |  |
| **4567** | 0.025 | 0.019 | 1.000 | 0.923 |  |
| **4568** | 1.000 | 0.876 | 0.034 | 0.020 | 0.654 |

Appendix 1.3: Allele frequencies by population for common variants identified in *NEUROD.*  The Belfast and Yorkshire collection of families were analyzed as part of the UK population.

|  | **Parental Minor Allele Frequency in Population (%)** | | | | |
| --- | --- | --- | --- | --- | --- |
| **DIL Reference Number** | **UK** | **USA** | **Finland** | **Norway** | **Romania** |
| 4565 | 36.6 | 36.0 | - | - | - |
| 2402 | 36.8 | 36.8 | 36.4 | 37.3 | 36.9 |
| 4566 | 12.1 | 12.3 | 20.1 | 17.3 | 11.0 |
| 4567 | 13.6 | 11.9 | - | - | - |
| 4568 | 37.4 | 37.9 | - | - | - |

Appendix 1.4: Data for transmission analysis by population for Ala45Thr / DIL2402 and DIL4566 by population.  The Belfast and Yorkshire collection of families were analyzed as part of the UK population. *Power is calculated for *P* < 0.05, OR of 1.2. Values in parentheses are values for OR of 1.5

| Population | **Number of Families Available** | **DIL Reference Number** | **Parental Minor Allele Frequency in Population (%)** | TDT | | | **GTRR** | ***Power for 10% Minor Allele Frequency**  **(%)** | ***Power for 36% Minor Allele Frequency**  **(%)** |
| --- | --- | --- | --- | --- | --- | --- | --- | --- | --- |
| **T** | **U** | ***P*TDT** | ***P*GTRR** |
| UK | 618 | 2402 | 36.8 | 410 | 401 | 0.76 | 0.78 | 29.0 (90.6) | 59.4 (99.9) |
| 4566 | 12.1 | 198 | 184 | 0.51 | 0.8 |
| USA | 328 | 2402 | 36.8 | 252 | 234 | 0.47 | 0.77 | 17.6 (66.0) | 36.0 (95.0) |
| 4566 | 12.3 | 145 | 116 | 0.06 | 0.12 |
| Finland | 926 | 2402 | 36.4 | 506 | 505 | 0.98 | 0.49 | 40.7 (98.0) | 76.8 (99.9) |
| 4566 | 20.1 | 266 | 293 | 0.25 | 0.51 |
| Norway | 159 | 2402 | 37.3 | 145 | 162 | 0.32 | 0.34 | 10.9 (37.7) | 19.9 (70.6) |
| 4566 | 17.3 | 29 | 21 | 0.25 | 0.64 |
| Romania | 233 | 2402 | 36.9 | 119 | 138 | 0.24 | 0.18 | 13.8 (51.6) | 27.1 (85.9) |
| 4566 | 11.0 | 41 | 37 | 0.65 | 0.73 |

T = transmitted; U = untransmitted.

Appendix 1.5

**Inclusion Criteria for The British Diabetic Association – now Diabetes UK - Warren Repository – UK families (1):**

- 458 families.
- Ascertained for at least two affected children in families where both parents are alive.
- At least one child was diagnosed with type 1 diabetes before the age of 17 and the other under the age of 29 years at diagnosis.

Inclusion Criteria for Selected Human Biological Database Interchange (HBDI) – USA Families (2):

- 328 families.
- There are least two children affected with type 1 diabetes.
- If there are more than two affected children, there is also at least one unaffected child in the family.
- The proband was diagnosed with type 1 diabetes age 17 or younger and a second affected child was diagnosed with type 1 diabetes age 29 or under.

Inclusion Criteria for Belfast collection of families (3):

- 250 families.
- Families with at least one affected child and where both parents are alive.
- Proband was diagnosed with type 1 diabetes before the age of 15.

Inclusion Criteria for Finnish collection of families (4):

- 926 families.
- Families with one or more child diagnosed with type 1 diabetes.
- Insulin treatment at diagnosis or soon after (usually < 1 year).

Inclusion Criteria for Norwegian collection of families (5):

- 159 families.
- Families recruited as part of ENDIT study.
- One child in the family clinically diagnosed as having type 1 diabetes at a pediatric department in a hospital in Norway.
- Children were < 18 yr at age of onset.

Inclusion Criteria for Romanian collection of families (6):

- 233 families.
- Families with one or more child diagnosed with type 1 diabetes.
- The child was on insulin treatment within one month from diagnosis and used insulin continuously following diagnosis.
- No age of diagnosis limits were set but >80% of cases were diagnosed under the age of 18 yr.

Inclusion Criteria for the Yorkshire collection of families (Included with the UK collection in Appendix 1.3) (7):

- 80 families.
- Families must be resident within the former Yorkshire Regional Health Authority.
- Families with children diagnosed with type 1 diabetes during 1993 and 1994.
- Affected child diagnosed between the ages of 0 and 15 years of age.

**References**

1. Bain SC, Todd JA, Barnett AH: The British Diabetic Association--Warren repository. Autoimmunity 7:83-85, 1990

2. Lernmark A: Human cell lines from families available for diabetes research. Diabetologia 34:61, 1991

3. Patterson CC, Carson DJ, Hadden DR, Waugh NR, Cole SK: A case-control investigation of perinatal risk factors for childhood IDDM in Northern Ireland and Scotland. Diabetes Care 17:376-381, 1994

4. Tuomilehto J, Lounamaa R, Tuomilehto-Wolf E, Reunanen A, Virtala E, Kaprio EA, Akerblom HK: Epidemiology of childhood diabetes mellitus in Finland--background of a nationwide study of type 1 (insulin-dependent) diabetes mellitus. The Childhood Diabetes in Finland (DiMe) Study Group. Diabetologia 35:70-76, 1992

5. Undlien DE, Akselsen HE, Joner G, Dahl-Jorgensen K, Aagenaes O, Sovik O, Thorsby E, Ronningen KS: No difference in the parental origin of susceptibility HLA class II haplotypes among Norwegian patients with insulin-dependent diabetes mellitus. Am J Hum Genet 57:1511-1514, 1995

6. Ionescu-Tirgoviste C, Guja C, Herr M, Cucca E, Welsh K, Bunce M, Marshall S, Todd JA: Low frequency of HLA DRB1*03 - DQB1*02 and DQB1*0302 haplotypes in Romania is consistent with the country's low incidence of Type I diabetes. Diabetologia 44 Suppl 3:B60-66, 2001

7. Feltbower RG, McKinney PA, Parslow RC, Stephenson CR, Bodansky HJ: Type 1 diabetes in Yorkshire, UK: time trends in 0-14 and 15-29-year-olds, age at onset and age-period-cohort modelling. Diabet Med 20:437-441, 2003
